# Supplementary material for: Efficacy and safety of fluticasone propionate/formoterol fumarate in pediatric asthma patients: a randomized controlled trial
Source: PubMed Central journal article supplement — Ther Adv Respir Dis. 2018 Jun 1;12:1753466618777924. doi: 10.1177/1753466618777924 (PMC5985608; doi:10.1177/1753466618777924), 2018-06-01
Supplement: Supplementary_data.pdf [file Supplementary_data.pdf]

**Table S1 Independent Ethics Committees**

| <b>Bulgaria</b>                                                                                                                                 | <b>Poland</b>                                                                                                                                                                          |
|-------------------------------------------------------------------------------------------------------------------------------------------------|----------------------------------------------------------------------------------------------------------------------------------------------------------------------------------------|
| Ethics Committee for Multicentre Trials (ECMT), 5, Sveta Nedelya Square, 1000 Sofia                                                             | Okręgowa Izba Lekarska, Ul. Świetojańska 7, 15-082 Białystok                                                                                                                           |
| MHAT Plovdiv, 234, Bulgaria Blvd., 4003 Plovdiv                                                                                                 | Komisja Bioetyczna przy Wielkopolskiej Izbie Lekarskiej, Ul. Nowowiejskiego 5, 61-734 Poznań                                                                                           |
| MHAT Aleksandrowska, 1, Georgi Sofiiski St., 1431 Sofia                                                                                         | Komisja Bioetyki Uniwersytetu Medycznego w Łodzi, Al. Kościuszki 4, 90-419 Łódź                                                                                                        |
| District Dispensary for Pulmonary and Phthisiatric Diseases - Ruse, 1, Aleya Lilia St., 7000 Ruse                                               | Komisja Bioetyczna Lubelskiej Izby Lekarskiej, ul. Chmielna 4, 20-079 Lublin                                                                                                           |
| MHAT "Sveti Georgi", 15 A Vasil Aprilov St., 4002 Plovdiv,                                                                                      | Komisja Bioetyczna przy Okręgowej Izbie Lekarskiej w Łodzi, ul. Czerwona 3, 90-005 Łódź                                                                                                |
| MHAT "Dr. Georgi Stranski", 8 A Georgi Kochev Str., 5800 Pleven                                                                                 | Komisja Bioetyczna przy Okręgowej Izbie Lekarskiej w Gdańsku, ul. Śniadeckich 33, 80-204 Gdańsk                                                                                        |
| <b>Czech Republic</b>                                                                                                                           | Okręgowa Izba Lekarska, ul. Krupnicza 11 A, 31-123 Kraków                                                                                                                              |
| Etická komise FN Brno, Jihlavská 20, 625 00 Brno                                                                                                | Komisja Bioetyczna przy Dolnośląskiej Izbie Lekarskiej, ul. Matejki 6, 50-333 Wrocław                                                                                                  |
| Etická komise, FN na Bulovce, Budínova 2, 180 00 Praha 8                                                                                        | <b>Romania</b>                                                                                                                                                                         |
| Etická komise, IKEM a FTNSP, Vídeňská 800, 140 59 Praha 4                                                                                       | Comisia Nationala de Etica pentru Studiul Clinic al Medicamentului (National Ethics Commission for Clinical Study of Medicine), 48 Av. Sanatescu Street, district 1, 011478, Bucharest |
| <b>Hungary</b>                                                                                                                                  | <b>Russia</b>                                                                                                                                                                          |
| Arany János u. 6-8., Budapest, 1051 - H                                                                                                         | 3, Rakhmanovsky per., Moscow, 127994                                                                                                                                                   |
| Szent István lakótelep 7., Szigetvar, 2673 - H                                                                                                  | 1, Ostrovityanova str., Moscow, 117997                                                                                                                                                 |
| Szentpéteri kapu 72-76., Miskolc, 3526 - H                                                                                                      | 25, Mytninskaya str., Saint-Petersburg, 191144                                                                                                                                         |
| Nagyerdei krt. 98. , Debrecen, 4032 - H                                                                                                         | 14, Avangardnaya str., Saint-Petersburg, 198205                                                                                                                                        |
| Korányi fasor 8-10., Szeged, 6701 - H                                                                                                           | 112, Bolshaya Kazachya, Saratov, 410012                                                                                                                                                |
| Semmelweis u. 1., Gyula, 5700 - H                                                                                                               | 2, Litovskaya str., Moscow, 194100                                                                                                                                                     |
| Dr. Monszpart L. u. 1., Kiskunhalas, 6400 - H                                                                                                   | 2, Taldomskaya str., Moscow, 125412                                                                                                                                                    |
| Bartók Béla út 2-26., Debrecen, 4043 - H                                                                                                        | 20., bld.1, Delegatskaya, str., Moscow, 127473                                                                                                                                         |
| Vasvári P. u. 2-4. , Győr, 9024 - H                                                                                                             | <b>Ukraine</b>                                                                                                                                                                         |
| Üllői út 93. , Budapest, 1091 - H                                                                                                               | 73 Lugova Str., 95003 Simferopol                                                                                                                                                       |
| Kórház utca 1., Veszprem, 8200 - H                                                                                                              | 70 Lenina Ave., 69063 Zaporizhzhia                                                                                                                                                     |
| <b>India</b>                                                                                                                                    | 5 Muranova Str., 61093 Kharkiv                                                                                                                                                         |
| Institutional Ethics Committee, Sterling Hospital, 8th Floor, sterling Hospital Road, Memnagar, Ahmedabad - 380052, Gujarat                     | 10 N.Amosova Str., 03680 Kyiv                                                                                                                                                          |
| Sir Ganga Ram Hospital Ethics Committee, Room No 1496, IV Floor, Old Building , Sir Ganga Ram Hospital, Old Rajinder Nagar, New Delhi-110060    | 337-A Klochkivska Str., 61051 Kharkiv                                                                                                                                                  |
| Ethics Committee, Inamdar Multispeciality Hospital, Hospital Building, S.No. 15, Fatima Nagar, Pune-411040, Maharashtra                         | 3 Academic Vorobyev Str., 65031 Odesa                                                                                                                                                  |
| Institutional Ethics Committee, CMC Ludhiana, Brown Road, Punjab – 141 008                                                                      | 8 Mayborody Str., 04050 Kyiv                                                                                                                                                           |
| MidcityIndependent Ethics Committee, 3rd Floor, 799, Omnagar, Opp. Tajshree Building, Mirchi Bazaar, SakkardaraChowk, Umred Road, Nagpur-440009 | 77 Titova Str., 95034 Simferopol                                                                                                                                                       |

**Table S2 Change in Morning and Evening FEV<sub>1</sub> (Litres) and Peak Flow Measurements (Litres/Minute) from Baseline over the 12 Week Treatment Period, Full Analysis Population**

| Analysis Visit                                                                                 |                                    | Fluticasone/formoterol (N=167) | Fluticasone (N=171)  | Fluticasone/salmeterol (N=168) |
|------------------------------------------------------------------------------------------------|------------------------------------|--------------------------------|----------------------|--------------------------------|
| <b>Change in diary morning FEV<sub>1</sub> from Baseline</b>                                   |                                    |                                |                      |                                |
| Overall                                                                                        | n                                  | 163                            | 165                  | 162                            |
|                                                                                                | LS Mean* (95% CI)                  | 0.06 (0.02, 0.10)              | 0.01 (-0.03, 0.05)   | 0.02 (-0.02, 0.06)             |
|                                                                                                | Difference† (95% CI of Difference) |                                | 0.06 (0.00, 0.11)    | 0.05 (-0.01, 0.10)             |
|                                                                                                | P-Value‡                           |                                | 0.036                | 0.086                          |
| <b>Change in diary evening FEV<sub>1</sub> from Baseline</b>                                   |                                    |                                |                      |                                |
| Overall                                                                                        | n                                  | 163                            | 169                  | 164                            |
|                                                                                                | LS Mean* (95% CI)                  | 0.05 (0.01, 0.08)              | 0.01 (-0.02, 0.05)   | -0.00 (-0.04, 0.03)            |
|                                                                                                | Difference† (95% CI of Difference) |                                | 0.03 (-0.02, 0.08)   | 0.05 (-0.00, 0.10)             |
|                                                                                                | P-Value‡                           |                                | 0.203                | 0.060                          |
| <b>Change in Morning Peak Flow Measurements</b>                                                |                                    |                                |                      |                                |
| Overall                                                                                        | n                                  | 167                            | 169                  | 166                            |
|                                                                                                | LS Mean* (95% CI)                  | 16.49 (11.50, 21.48)           | 9.00 (4.03, 13.97)   | 12.67 (7.68, 17.67)            |
|                                                                                                | Difference† (95% CI of Difference) |                                | 7.49 (1.24, 13.75)   | 3.82 (-2.48, 10.12)            |
|                                                                                                | P-Value‡                           |                                | 0.019                | 0.234                          |
| <b>Change in Evening Peak Flow Measurements</b>                                                |                                    |                                |                      |                                |
| Overall                                                                                        | n                                  | 167                            | 170                  | 166                            |
|                                                                                                | LS Mean* (95% CI)                  | 14.22 (9.53, 18.91)            | 7.68 (3.03, 12.34)   | 11.92 (7.19, 16.64)            |
|                                                                                                | Difference† (95% CI of Difference) |                                | 6.54 (0.37, 12.71)   | 2.31 (-3.91, 8.52)             |
|                                                                                                | P-Value‡                           |                                | 0.038                | 0.466                          |
| <b>Change in Peak Flow from pre-dose baseline to pre-dose at Week 12</b>                       |                                    |                                |                      |                                |
| Overall                                                                                        | n                                  | 166                            | 167                  | 165                            |
|                                                                                                | LS Mean* (95% CI)                  | 27.94 (21.20, 34.69)           | 20.39 (13.66, 27.12) | 27.30 (20.51, 34.09)           |
|                                                                                                | Difference† (95% CI of Difference) |                                | 7.56 (1.07, 14.04)   | 0.65 (-5.87, 7.17)             |
|                                                                                                | P-Value‡                           |                                | 0.022                | 0.845                          |
| <b>Change in Peak Flow Measurements from pre-dose baseline to 2-hours post-dose at Week 12</b> |                                    |                                |                      |                                |
| Overall                                                                                        | n                                  | 165                            | 165                  | 165                            |
|                                                                                                | LS Mean* (95% CI)                  | 43.59 (36.35, 50.83)           | 29.77 (22.54, 36.99) | 41.33 (34.05, 48.61)           |
|                                                                                                | Difference† (95% CI of Difference) |                                | 13.83 (7.06, 20.59)  | 2.26 (-4.53, 9.05)             |
|                                                                                                | P-Value‡                           |                                | <0.001               | 0.513                          |

N: Number of patients in population. n: Number of patients with data available. CI: Confidence Interval. FEV<sub>1</sub>: forced expiratory volume in the 1<sup>st</sup> second.

Note: Daily morning peak flow measurement was calculated from the patient's diary for the 7 days prior to the visit.

\*Least square mean from a repeated measures ANCOVA with fixed terms for treatment, age group, PEF<sub>R</sub> at baseline, visit and treatment by visit interaction, and centre as a random effect. † Difference: LS Mean Flutiform - LS Mean Fluticasone/Seretide. ‡P-value of the pairwise treatment comparisons (based on the null hypothesis that there is no difference in treatment means).

**Table S3 Change in PAQLQ Overall Score from Baseline to Week 12 of  $\geq 0.5$  Units, Stratified by Age Group, Full Analysis Population**

|                                      | Fluticasone/formoterol | Fluticasone  | Fluticasone/salmeterol |
|--------------------------------------|------------------------|--------------|------------------------|
| <b>Age Group = 5 to 6 years</b>      |                        |              |                        |
| N                                    | 27                     | 31           | 24                     |
| Yes*                                 | 17 ( 63.0)             | 20 ( 64.5)   | 15 ( 62.5)             |
| No                                   | 7 ( 25.9)              | 8 ( 25.8)    | 7 ( 29.2)              |
| Missing                              | 3 ( 11.1)              | 3 ( 9.7)     | 2 ( 8.3)               |
| Odds Ratio**                         |                        | 1.51         | 3.16                   |
| 95% CI**                             |                        | (0.24, 9.75) | (0.40, 24.66)          |
| <b>Age Group = 7 to &lt;12 years</b> |                        |              |                        |
| N                                    | 140                    | 140          | 144                    |
| Yes*                                 | 83 ( 59.3)             | 84 ( 60.0)   | 89 ( 61.8)             |
| No                                   | 51 ( 36.4)             | 43 ( 30.7)   | 46 ( 31.9)             |
| Missing                              | 6 ( 4.3)               | 13 ( 9.3)    | 9 ( 6.3)               |
| Odds Ratio**                         |                        | 0.98         | 0.87                   |
| 95% CI**                             |                        | (0.52, 1.82) | (0.47, 1.59)           |
| <b>Overall</b>                       |                        |              |                        |
| N                                    | 167                    | 171          | 168                    |
| Yes*                                 | 100 ( 59.9)            | 104 ( 60.8)  | 104 ( 61.9)            |
| No                                   | 58 ( 34.7)             | 51 ( 29.8)   | 53 ( 31.5)             |
| Missing                              | 9 ( 5.4)               | 16 ( 9.4)    | 11 ( 6.5)              |
| Odds Ratio**                         |                        | 1.02         | 0.96                   |
| 95% CI**                             |                        | (0.57, 1.84) | (0.54, 1.71)           |

PAQLQ-IA: Paediatric Asthma Quality of Life Questionnaire - Interviewer Administered. N: Number of patients in population. n: Number of patients with data available. %: Percentage based on N. CI: Confidence Interval.

\* Patients with a change in PAQLQ overall score from baseline to week 12 of  $\geq 0.5$  units.

\*\* Logistic regression estimates with fixed terms for treatment, age (years) and PAQLQ score at baseline, and centre as a random effect.

**Table S4 Reduction in ACQ-IA Overall Score from Baseline to Week 12 of  $\geq 0.5$  Units, Stratified by Age Group, Full Analysis Population**

|                                 | Fluticasone/formoterol<br>(N=167) | Fluticasone<br>(N=171) | Fluticasone/salmeterol<br>(N=168) |
|---------------------------------|-----------------------------------|------------------------|-----------------------------------|
| <b>Age group = 5</b>            |                                   |                        |                                   |
| N                               | 12                                | 11                     | 6                                 |
| Yes*                            | 10 ( 83.3)                        | 7 ( 63.6)              | 5 ( 83.3)                         |
| No                              | 2 ( 16.7)                         | 2 ( 18.2)              | -                                 |
| Missing                         | -                                 | 2 ( 18.2)              | 1 ( 16.7)                         |
| Odds Ratio**                    |                                   | NC                     | NC                                |
| 95% CI**                        |                                   | NC                     | NC                                |
| <b>Age group = 6 – 10 years</b> |                                   |                        |                                   |
| N                               | 126                               | 129                    | 126                               |
| Yes*                            | 92 ( 73.0)                        | 102 ( 79.1)            | 98 ( 77.8)                        |
| No                              | 26 ( 20.6)                        | 17 ( 13.2)             | 21 ( 16.7)                        |
| Missing                         | 8 ( 6.3)                          | 10 ( 7.8)              | 7 ( 5.6)                          |
| Odds Ratio**                    |                                   | 0.75                   | 0.85                              |
| 95% CI**                        |                                   | (0.36, 1.56)           | (0.42, 1.72)                      |
| <b>Age group = 11 years</b>     |                                   |                        |                                   |
| N                               | 29                                | 31                     | 36                                |
| Yes*                            | 20 ( 69.0)                        | 21 ( 67.7)             | 24 ( 66.7)                        |
| No                              | 7 ( 24.1)                         | 7 ( 22.6)              | 7 ( 19.4)                         |
| Missing                         | 2 ( 6.9)                          | 3 ( 9.7)               | 5 ( 13.9)                         |
| Odds Ratio**                    |                                   | 0.75                   | 0.59                              |
| 95% CI**                        |                                   | (0.19, 2.93)           | (0.15, 2.26)                      |
| <b>Overall</b>                  |                                   |                        |                                   |
| Yes*                            | 122 ( 73.1)                       | 130 ( 76.0)            | 127 ( 75.6)                       |
| No                              | 35 ( 21.0)                        | 26 ( 15.2)             | 28 ( 16.7)                        |
| Missing                         | 10 ( 6.0)                         | 15 ( 8.8)              | 13 ( 7.7)                         |
| Odds Ratio**                    |                                   | 0.79                   | 0.81                              |
| 95% CI**                        |                                   | (0.42, 1.48)           | (0.44, 1.50)                      |

ACQ-IA: Asthma Control Questionnaire - Interviewer administered. N: Number of patients in population. n: Number of patients with data available. %: Percentage based on N. CI: Confidence Interval.

NC = Not calculable.

\* Patients with a reduction in ACQ-IA overall score from baseline to week 12 of  $\geq 0.5$  units.

\*\* Logistic regression estimates with fixed terms for treatment, age (years) and ACQ-IA score at baseline, and centre as a random effect.
